# Supplementary material for: Volcanic stratospheric sulfur injections and aerosol optical depth during the Holocene (past 11,500 years) from a bipolar ice core array
Source: Copernicus journal article supplement (doi:10.5194/essd-2021-422), 2022-01-10
Supplement: Supplementary file [file essd-2021-422-RC1-supplement.pdf]

## Review ESSD paper 2021 - 422

Dear authors. After carefully reading your article 'Volcanic stratospheric sulfur injections and aerosol optical depth during the Holocene (past 11,500 years) from a bipolar ice core array' I have some minor revisions that should be corrected before publishing.

### 1. Spelling mistakes and form

Line: 107/108  $\text{kg m}^{-2}\text{yr}^{-1}$  should be in one line

Line 122 / 197: I would suggest to delete 'elsewhere' and just mention the references.

Line 288 / 302: Replace '&' by 'and'

Line 390: Check the brackets

Line 767: Two times 'as far'

Line 793: Will be posted at 'XXX' ?

General:

Make sure you have either a space or no space between a number and '%'.

Make sure you have a '.' or ',' for number higher than thousand or not (e. g. line 17 '11500' compared to line 32 '2,500')

### Content

In general it is good and clear written. It is easy to understand for the reader. However there are many abbreviations, and I wonder if there is a possibility to use them a bit less. Also some of the abbreviation might be clear for you and scientists that are very familiar with this topic, but not for others. E. g. TgS : Hence I would suggest to either explain them ones, or to maybe add a table that summarizes them.
